# Supplementary material for: Bridging Disciplines: Enhancing Communication Skills through Interprofessional Simulation in Health Sciences Education
Source: Research Square preprint supplement (doi:10.21203/rs.3.rs-7345439/v1), 2025-09-24
Supplement: Supplementary file 1 [file a75ef6edab6d569e184c9fb3.docx]

**INTERVIEW GUIDE**

**Bridging Disciplines: Enhancing Communication Skills through Interprofessional Simulation in Health Sciences Education**

Central question: *What are your views regarding the introduction of interprofessional simulations in the curriculum?*

The following interview techniques guided probing questions aligned with the study’s objectives:

- Active listening,
- Clarification,
- Paraphrasing,
- Reflection, and
- Summarization.
